# Supplementary material for: A new ferroelastic hybrid material with a large spontaneous strain: (Me3NOH)2[ZnCl4]
Source: Royal Society of Chemistry journal article supplement (doi:10.1039/c9cc03862k), 2019-01-01
Supplement: c9cc03862k1.pdf [file c9cc03862k1.pdf]

## *Supporting Information*

### **A New Ferroelastic Hybrid Material with a Large Spontaneous Strain: $(\text{Me}_3\text{NOH})_2[\text{ZnCl}_4]$**

*Wei Yuan,<sup>a</sup> Ying Zeng,<sup>a</sup> Ya-Yin Tan,<sup>b</sup> Jian-Hua Zhou,<sup>b</sup> Wei-Jian Xu,<sup>a,c,\*</sup> Wei-Xiong Zhang<sup>a,\*</sup> and Xiao-Ming Chen<sup>a</sup>*

<sup>a</sup> MOE Key Laboratory of Bioinorganic and Synthetic Chemistry, School of Chemistry, Sun Yat-Sen University, Guangzhou, 510275, P. R. China.

<sup>b</sup> Key Laboratory of Sensing Technology and Biomedical Instruments of Guangdong Province, School of Biomedical Engineering, Sun Yat-Sen University, Guangzhou 510275, China.

<sup>c</sup> Department of Chemistry & CICECO-Aveiro Institute of Materials, University of Aveiro, 3810-193 Aveiro, Portugal.

---

## Experimental

### Synthesis

Trimethylamine N-oxide hydrochloride was obtained by reaction of trimethylamine N-oxide dehydrate with 36.5% aqueous HCl. All the other chemicals were commercially available and were used without further purification.

Compound **1** was synthesized by mixing aqueous solutions of ZnCl<sub>2</sub>, HCl (36.5%), and trimethylamine N-oxide hydrochloride in the ratio of 1:2:1. Block colourless single crystals were obtained by slow evaporation of solvent at room temperature after a few days. The bulk phase purity was confirmed by powder X-ray diffraction (Fig. S1). Elemental analysis, calcd (%) for **1** (C<sub>6</sub>H<sub>20</sub>Cl<sub>4</sub>N<sub>2</sub>O<sub>2</sub>Zn, 359.46): C, 20.05; N, 7.79; H, 5.61. Found, C, 20.26; N, 7.73; H, 6.17.”

### Single-crystal X-ray crystallography

The *in-situ* variable-temperature single-crystal X-ray diffraction intensities were collected on a RigakuXtaLAB P300DS single-crystal diffractometer with graphite monochromated Cu-K $\alpha$  radiation ( $\lambda = 1.54178 \text{ \AA}$ ). The CrystalClear software package (Rigaku) was used for data collection, cell refinement, and data reduction. Absorption corrections were applied by using multi-scan program REQAB (Jacobson, 1998). The structures were solved by direct methods and refined using full-matrix least-squares methods with the SHELX program package and Olex2 program.<sup>1</sup> Non-hydrogen atoms were refined anisotropically and the positions of the hydrogen atoms were generated geometrically. The crystal data and structure refinement results at different temperatures for **1** are listed in Table S1. Selected bond distances and bond angles are listed in Table S2 and S3.

### Thermogravimetric analyses

Thermogravimetric analyses (TGA) were carried out on a TA Q50 system with a heating rate of 5 K min<sup>-1</sup> under a nitrogen atmosphere.

### DSC measurements

Differential scanning calorimetry (DSC) was carried out on a TA DSC Q2000 instrument under a nitrogen atmosphere in aluminum crucibles with heating and cooling rates of 10 K/min from 293 K to 393 K.

---

### **Dielectric measurements**

The dielectric measurements were carried on a TH2828A impedance analyzer for **1** from 500 Hz to 1 MHz, with an amplitude of 1.0 V, and a temperature sweeping rate of approximately 5 K/min for **1** in a Mercury iTC cryogenic environment controller of Oxford Instrument. The pressed-powder pellets were deposited with silver conducting glue used as electrodes.

### **Variable-temperature powder X-ray diffraction (PXRD)**

Variable temperature PXRD patterns (Cu K $\alpha$ ,  $\lambda = 1.54178 \text{ \AA}$ ) were collected on Bruker Advance D8 DA VANCE diffractometer for **1** in the temperature range of 303–383 K.

### **Variable-temperature polarization microscopy**

Variable-temperature polarization microscopy observations were carried out with a polarizing microscope Leica DM2500 P equipped with a Linkam cooling/heating stage THMSE 600. The temperature was stabilized with an accuracy of  $\pm 0.1 \text{ K}$ .

### **Elemental analysis**

Elemental (C, H, and N) analyses were performed on a Perkin-Elmer Vario EL elemental analyzer with as-synthesized samples.

---

## Deduction of domain orientation

During the phase transition from  $Pnma$  (**HTP**) to  $P2_1/n11$  (**RTP**), a symmetry breaking occurs from 8 ( $E, i, 3C_2, 3\sigma$ ) to 4 ( $E, i, C_2, \sigma_h$ ) symmetry elements, classifying **1** to be an  $mmmF2/m$  ferroelastic species with two possible orientation states in the ferroelastic phase, according to Aizu.<sup>2</sup> The spontaneous strain within these two states are expressed as

$$\varepsilon_{ij}^{(1)} = \begin{bmatrix} \varepsilon_{11} & 0 & 0 \\ 0 & \varepsilon_{22} & \varepsilon_{23} \\ 0 & \varepsilon_{23} & \varepsilon_{33} \end{bmatrix}, \quad \varepsilon_{ij}^{(2)} = \begin{bmatrix} \varepsilon_{11} & 0 & 0 \\ 0 & \varepsilon_{22} & -\varepsilon_{23} \\ 0 & -\varepsilon_{23} & \varepsilon_{33} \end{bmatrix}$$

The modified spontaneous strains proposed by Aizu<sup>3</sup> are then

$$\varepsilon_{sij}^{(i)} = \varepsilon_{ij}^{(i)} - \frac{1}{q} \sum_{k=1}^q \varepsilon_{ij}^{(k)} \quad (i = 1, 2, \dots, q)$$

In this case,

$$\varepsilon_{sij}^{(1)} = \begin{bmatrix} 0 & 0 & 0 \\ 0 & 0 & \varepsilon_{23} \\ 0 & \varepsilon_{23} & 0 \end{bmatrix}, \quad \varepsilon_{sij}^{(2)} = \begin{bmatrix} 0 & 0 & 0 \\ 0 & 0 & -\varepsilon_{23} \\ 0 & -\varepsilon_{23} & 0 \end{bmatrix}$$

considering the compatibility condition of spontaneous strain<sup>4</sup>

$$[\varepsilon_{sij}^{(1)} - \varepsilon_{sij}^{(2)}]x_i x_j = 0$$

where  $x_i$  and  $x_j$  are components of unit vector on domain walls, we obtain  $2\varepsilon_{23}yz = 0$ , which gives the orientation of domain walls  $y = 0$  and  $z = 0$ .

**Table S1.** Crystal data and structure refinement parameters for **1** at **RTP** and **HTP**.

| Compound                                            | <b>1</b>                                                |              |
|-----------------------------------------------------|---------------------------------------------------------|--------------|
| Formula                                             | (Me <sub>3</sub> NOH) <sub>2</sub> [ZnCl <sub>4</sub> ] |              |
| <i>T</i> (K)                                        | 293(2)                                                  | 373(2)       |
| Phases                                              | RTP                                                     | HTP          |
| Crystal system                                      | Monoclinic                                              | Orthorhombic |
| Space group                                         | <i>P2<sub>1</sub>/n11</i>                               | <i>Pnma</i>  |
| <i>a</i> /Å                                         | 12.2339(2)                                              | 12.2052(6)   |
| <i>b</i> /Å                                         | 8.5620(1)                                               | 8.7156(4)    |
| <i>c</i> /Å                                         | 15.2029(3)                                              | 15.4497(7)   |
| <i>α</i> <sup>o</sup>                               | 100.244(2)                                              | 90           |
| <i>V</i> /Å <sup>3</sup>                            | 1567.07(5)                                              | 1643.5(2)    |
| <i>Z</i>                                            | 4                                                       | 4            |
| <i>D<sub>c</sub></i> /g cm <sup>-3</sup>            | 1.523                                                   | 1.453        |
| reflns coll.                                        | 3148                                                    | 1548         |
| unique reflns                                       | 2872                                                    | 945          |
| <i>R</i> <sub>1</sub> [ <i>I</i> > 2σ( <i>I</i> )]  | 0.0393                                                  | 0.1131       |
| <i>wR</i> <sub>2</sub> [ <i>I</i> > 2σ( <i>I</i> )] | 0.1125                                                  | 0.4149       |
| <i>R</i> <sub>1</sub> <sup>a</sup> (all data)       | 0.0414                                                  | 0.1243       |
| <i>wR</i> <sub>2</sub> <sup>b</sup> (all data)      | 0.1162                                                  | 0.4536       |
| GOF                                                 | 1.080                                                   | 1.088        |
| CCDC number                                         | 1915260                                                 | 1915261      |

$$^a R_1 = \sum ||F_o| - |F_c|| / \sum |F_o|, ^b wR_2 = \{ \sum w[(F_o)^2 - (F_c)^2]^2 / \sum w[(F_o)^2]^2 \}^{1/2}$$

**Table S2.** Selected bond lengths (Å) for **1** at **RTP** and **HTP**.

| <b>RTP</b> |           | <b>HTP</b>            |          |
|------------|-----------|-----------------------|----------|
| Zn1–Cl1    | 2.2472(7) | Zn1–Cl1 <sup>#1</sup> | 2.216(2) |
| Zn1–Cl2    | 2.2375(8) | Zn1–Cl1               | 2.216(2) |
| Zn1–Cl3    | 2.2999(7) | Zn1–Cl2               | 2.251(3) |
| Zn1–Cl4    | 2.2807(7) | Zn1–Cl3               | 2.243(3) |
| N1–O1      | 1.421(2)  | N1–O1                 | 1.426(9) |
| N1–C1      | 1.480(3)  | N1–C1                 | 1.474(9) |
| N1–C2      | 1.475(3)  | N1–C2                 | 1.497(9) |
| N1–C3      | 1.478(3)  | N1–C3                 | 1.456(9) |
| N2–O2      | 1.427(3)  | N2–O2                 | 1.426(9) |
| N2–C4      | 1.471(4)  | N2–C4                 | 1.470(9) |
| N2–C5      | 1.451(4)  | N2–C5                 | 1.463(9) |
| N2–C6      | 1.486(4)  | N2–C6                 | 1.482(9) |

Symmetry codes: #1, (x, 1/2-y, z)

**Table S3.** Selected bond angles (°) for **1** at **RTP** and **HTP**.

| <b>RTP</b>  |           | <b>HTP</b>                |           |
|-------------|-----------|---------------------------|-----------|
| Cl1–Zn1–Cl2 | 111.88(4) | Cl1–Zn1–Cl1 <sup>#1</sup> | 108.1(2)  |
| Cl1–Zn1–Cl3 | 107.46(3) | Cl1–Zn1–Cl2               | 109.5(2)  |
| Cl1–Zn1–Cl4 | 109.47(3) | Cl1–Zn1–Cl3               | 109.1(2)  |
| Cl2–Zn1–Cl3 | 110.73(3) | Cl2–Zn1–Cl3               | 111.4(2)  |
| Cl2–Zn1–Cl4 | 109.83(3) | O1–N1–C1                  | 103.0(12) |
| Cl3–Zn1–Cl4 | 107.33(3) | O1–N1–C2                  | 106.6(12) |
| O1–N1–C1    | 108.1(2)  | O1–N1–C3                  | 110.4(12) |
| O1–N1–C2    | 109.9(2)  | C1–N1–C2                  | 110.0(12) |
| O1–N1–C3    | 104.6(2)  | C1–N1–C3                  | 114.4(12) |
| C1–N1–C2    | 112.1(2)  | C2–N1–C3                  | 111.9(12) |
| C1–N1–C3    | 110.7(2)  | O2–N2–C4                  | 108.8(12) |
| C2–N1–C3    | 111.2(2)  | O2–N2–C5                  | 106.9(13) |
| O2–N2–C4    | 107.5(3)  | O2–N2–C6                  | 104.0(12) |
| O2–N2–C5    | 106.1(3)  | C4–N2–C5                  | 115.6(12) |
| O2–N2–C6    | 107.7(3)  | C4–N2–C6                  | 107.4(12) |
| C4–N2–C5    | 111.6(3)  | C5–N2–C6                  | 113.5(12) |
| C4–N2–C6    | 111.4(3)  |                           |           |
| C5–N2–C6    | 112.3(3)  |                           |           |

Symmetry codes: #1, (x, 1/2-y, z)

**Table S4.** Calculated spontaneous strains for the *mmmF2/m* ferroelastic species.

| Compounds                                                                          | $\beta / ^\circ$ | $\epsilon_{13}$ | $\epsilon_{22}$ | $\epsilon_{33}$ | $\epsilon_{ss}$ | Ref              |
|------------------------------------------------------------------------------------|------------------|-----------------|-----------------|-----------------|-----------------|------------------|
| (C <sub>5</sub> N <sub>2</sub> H <sub>16</sub> ) <sub>2</sub> [SbBr <sub>5</sub> ] | 116.79           | -0.2223         | -0.0006         | -0.1195         | 0.355           | S5               |
| (C <sub>3</sub> H <sub>5</sub> NH <sub>3</sub> ) <sub>2</sub> [CdCl <sub>4</sub> ] | 108.54           | -0.1608         | -0.0386         | -0.0412         | 0.239           | S6               |
| (C <sub>4</sub> H <sub>9</sub> N) <sub>2</sub> [PbBr <sub>4</sub> ]                | 105.32           | -0.1310         | 0.0034          | -0.0433         | 0.191           | S7               |
| (C <sub>7</sub> H <sub>13</sub> NH <sub>3</sub> ) <sub>2</sub> [SnI <sub>4</sub> ] | 100.81           | -0.0932         | -0.0039         | -0.0237         | 0.134           | S8               |
| <b>1</b>                                                                           | <b>100.24</b>    | <b>-0.0875</b>  | <b>0.0024</b>   | <b>-0.0317</b>  | <b>0.129</b>    | <b>This work</b> |
| (Me <sub>4</sub> P) <sub>4</sub> [Mn(SCN) <sub>6</sub> ]                           | 97.70            | -0.0648         | 0.0017          | -0.0425         | 0.102           | S9               |
| (Me <sub>3</sub> NCH <sub>2</sub> Br) <sub>2</sub> [CoBr <sub>4</sub> ]            | 93.44            | -0.0308         | 0.0360          | 0.0247          | 0.068           | S10              |
| (Me <sub>3</sub> NCH <sub>2</sub> Br) <sub>2</sub> [ZnBr <sub>4</sub> ]            | 93.54            | -0.0305         | -0.0021         | -0.0151         | 0.048           | S11              |
| (N-Methylpyrrolidinium)[MnCl <sub>3</sub> ]                                        | 93.19            | -0.0279         | -0.0033         | 0.0025          | 0.045           | S12              |
| (Me <sub>3</sub> NCH <sub>2</sub> Cl) <sub>2</sub> [ZnCl <sub>4</sub> ]            | 93.35            | -0.0289         | -0.0137         | -0.0113         | 0.045           | S13              |
| N-methylcyclohexylamine picrate                                                    | 93.47            | -0.0302         | 0.0034          | -0.0040         | 0.044           | S14              |
| (C <sub>5</sub> H <sub>12</sub> N)[CdCl <sub>3</sub> ]                             | 92.30            | -0.0196         | 0.0139          | -0.0249         | 0.040           | S15              |
| (F-TEDA)(BF <sub>4</sub> ) <sub>2</sub>                                            | 91.99            | -0.0170         | -0.0088         | -0.0206         | 0.033           | S16              |
| (C <sub>6</sub> H <sub>14</sub> N)[PbI <sub>3</sub> ]                              | 92.09            | -0.0181         | -0.0177         | -0.0059         | 0.032           | S17              |
| (NMe <sub>4</sub> ) <sub>2</sub> [HgCl <sub>4</sub> ]                              | 89.64            | 0.0031          | -0.0100         | -0.0238         | 0.027           | S18              |
| [C <sub>7</sub> H <sub>7</sub> NOF <sub>3</sub> (18-crown-6)]PF <sub>6</sub>       | 90.01            | -0.0001         | -0.0032         | -0.0035         | 0.016           | S19              |
| (C <sub>3</sub> H <sub>4</sub> NS)[CdBr <sub>3</sub> ]                             | 90.53            | -0.0046         | 0.0012          | -0.0003         | 0.009           | S20              |
| (C <sub>3</sub> H <sub>4</sub> NS)[CdCl <sub>3</sub> ]                             | 90.23            | -0.0020         | 0.0005          | -0.0018         | 0.008           | S21              |

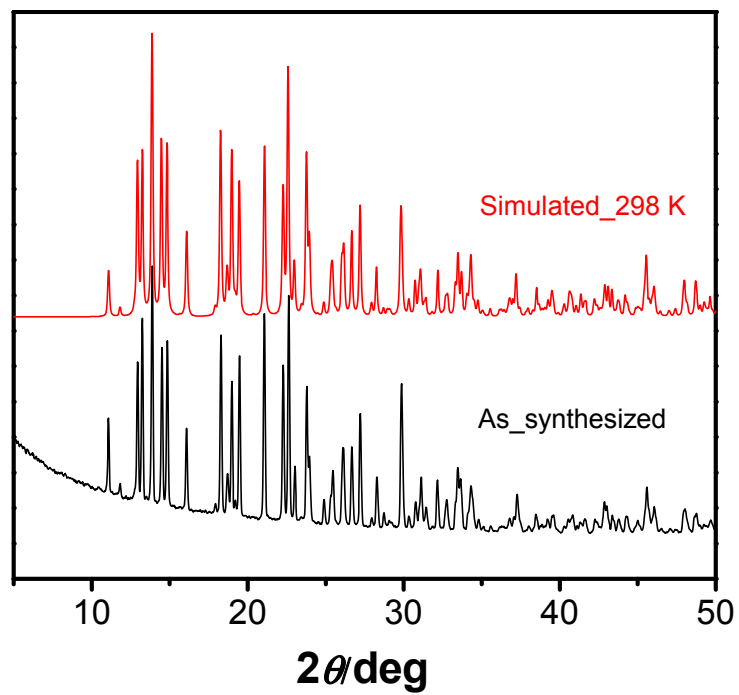

**Figure S1.** The PXR D patterns confirmed the phase purity of the as-synthesized sample **1**.



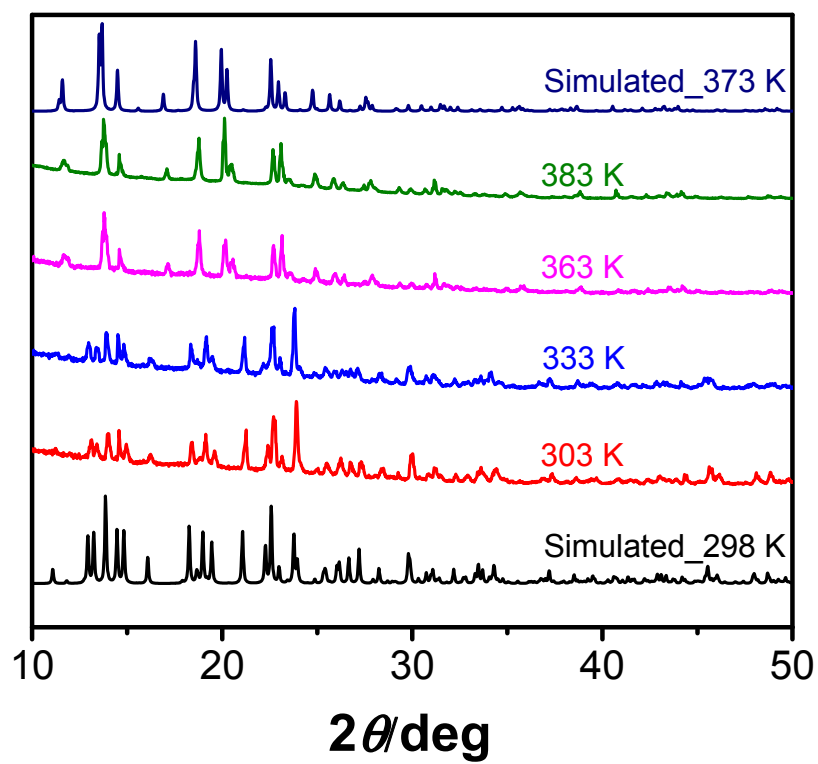

**Figure S2.** The variable-temperature powder X-ray diffraction patterns of **1**.

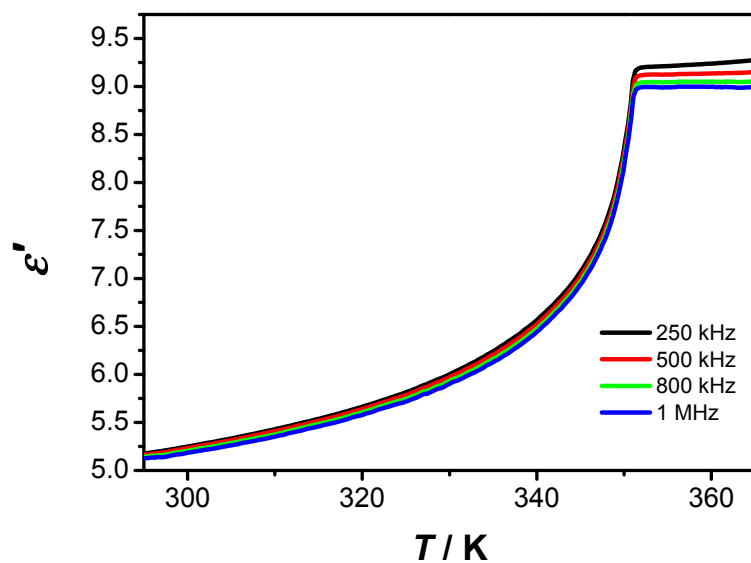

**Figure S3.** Temperature dependence of  $\epsilon'$  of **1** measured on the powder sample at 250-1000 kHz.

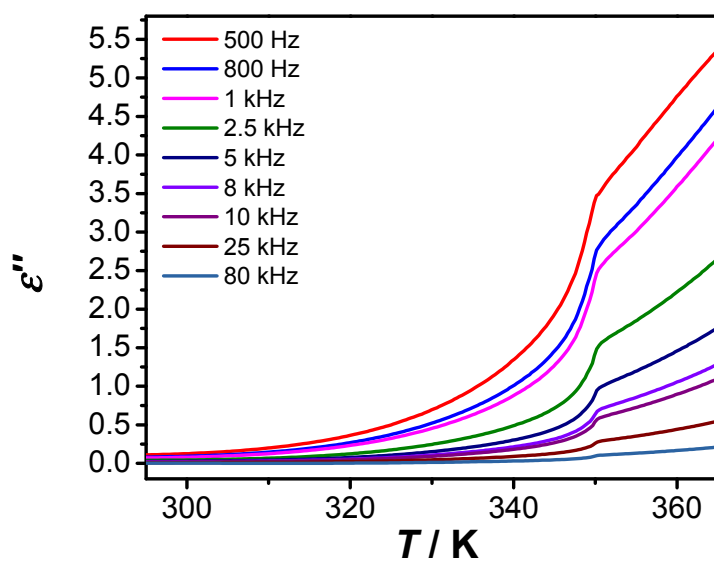

**Figure S4.** Temperature dependence of  $\epsilon''$  of **1** measured on the powder sample at 0.5-80 kHz.

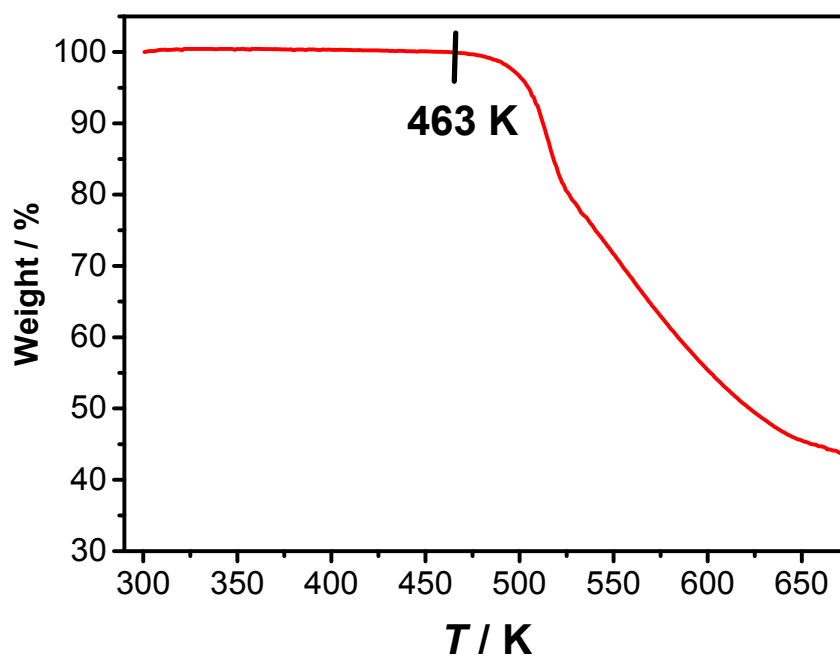

**Figure S5.** TG profiles of **1**.

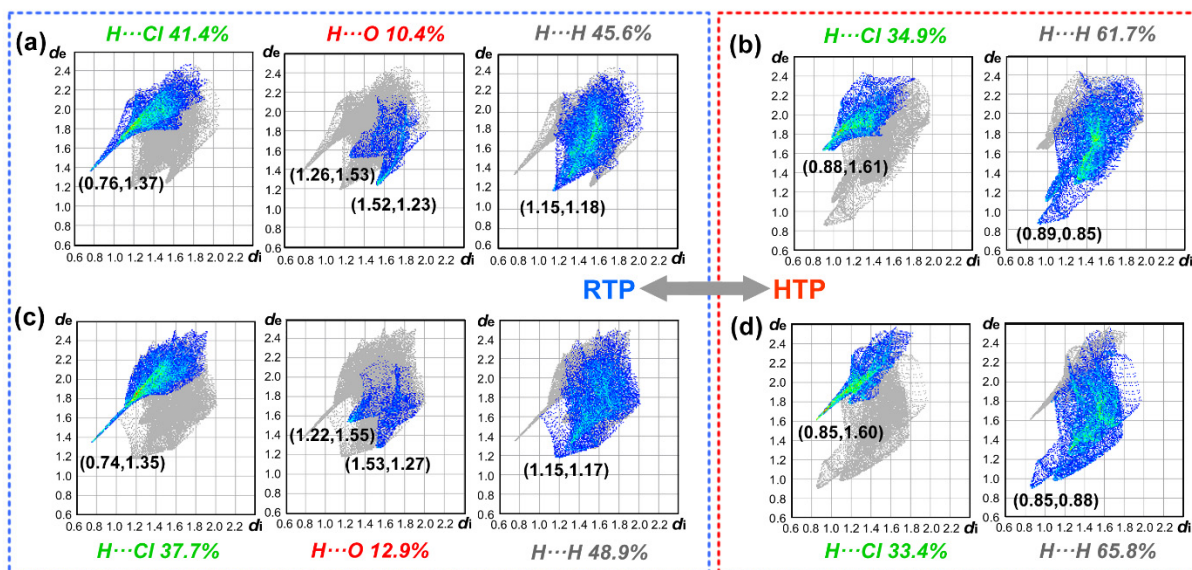

**Figure S6.** Decomposed fingerprint plots for **1** resolved into H...Cl, H...O and H...H contacts. Upper for Me<sub>3</sub>NOH<sup>+</sup> with O1 atom and the bottom for Me<sub>3</sub>NOH<sup>+</sup> with O2 atom.

---

## Reference

- S1. O. V. Dolomanov, L. J. Bourhis, R. J. Gildea, J. A. K. Howard and H. Puschmann, *J. Appl. Crystallogr.*, 2009, **42**, 339-341.
- S2. K. Aizu, *J. Phys. Soc. Jpn.*, 1969, **27**, 387-396.
- S3. K. Aizu, *J. Phys. Soc. Jpn.*, 1970, **28**, 706-716.
- S4. J. Sapriel, *Phys. Rev. B*, 1975, **12**, 5128.
- S5. C.-Y. Mao, W.-Q. Liao, Z.-X. Wang, Z. Zafar, P.-F. Li, X.-H. Lv and D.-W. Fu, *Inorg. Chem.*, 2016, **55**, 7661-7666.
- S6. S. Han, X. Liu, J. Zhang, C. Ji, Z. Wu, K. Tao, Y. Wang, Z. Sun and J. Luo, *J. Mater. Chem. C*, 2018, **6**, 10327-10331.
- S7. Z.-X. Wang, W.-Q. Liao, H.-Y. Ye and Y. Zhang, *Dalton Trans.*, 2015, **44**, 20406-20412.
- S8. X.-N. Li, P.-F. Li, Z.-X. Wang, P.-P. Shi, Y.-Y. Tang and H.-Y. Ye, *Polyhedron*, 2017, **129**, 92-96.
- S9. Q. Li, P.-P. Shi, Q. Ye, H.-T. Wang, D.-H. Wu, H.-Y. Ye, D.-W. Fu and Y. Zhang, *Inorg. Chem.*, 2015, **54**, 10642-10647.
- S10. X.-N. Hua, C.-R. Huang, J.-X. Gao, Y. Lu, X.-G. Chen and W.-Q. Liao, *Dalton Trans.*, 2018, **47**, 6218-6224.
- S11. J.-X. Gao, X.-N. Hua, P.-F. Li, X.-G. Chen and W.-Q. Liao, *J. Phys. Chem. C*, 2018, **122**, 23111-23116.
- S12. X.-F. Sun, P.-F. Li, W.-Q. Liao, Z. Wang, J. Gao, H.-Y. Ye and Y. Zhang, *Inorg. Chem.*, 2017, **56**, 12193-12198.
- S13. W.-Q. Liao, J.-X. Gao, X.-N. Hua, X.-G. Chen and Y. Lu, *J. Mater. Chem. C*, 2017, **5**, 11873-11878.
- S14. K. Tao, Z. Wu, S. Han, J. Zhang, C. Ji, Y. Wang, W. Zhang, J. Luo and Z. Sun, *J. Mater. Chem. C*, 2018, **6**, 4150-4155.
- S15. A. Zeb, Z. Sun, T. Khan, M. A. Asghar, Z. Wu, L. Li, C. Ji and J. Luo, *Inorg. Chem. Front.*, 2017, **4**, 1485-1492.
- S16. Y.-W. Zhang, P.-P. Shi, W.-Y. Zhang, Q. Ye and D.-W. Fu, *Inorg. Chem.*, 2018, **57**, 10153-10159.
- S17. A. Zeb, Z. Sun, A. Khan, S. Zhang, T. Khan, M. A. Asghar and J. Luo, *Inorg. Chem. Front.*, 2018, **5**, 897-902.
- S18. M. Amami, S. van Smaalen, L. Palatinus, A. Ben Salah, X. Helluy and A. Sebald, *Z. Kristallogr. Cryst. Mater.*, 2002, **217**, 532.
- S19. P.-F. Li, W.-Q. Liao, Q.-Q. Zhou, H.-Y. Ye and Y. Zhang, *Inorg. Chem. Commun.*, 2015, **61**, 77-81.
- S20. W.-Q. Liao, H.-Y. Ye, Y. Zhang and R.-G. Xiong, *Dalton Trans.*, 2015, **44**, 10614-10620.
- S21. G.-Q. Mei and W.-Q. Liao, *J. Mater. Chem. C*, 2015, **3**, 8535-8541.
